# Supplementary material for: Age-specific biological and molecular profiling distinguishes paediatric from adult acute myeloid leukaemias
Source: PubMed Central journal article supplement (PMC6290074; doi:10.1038/s41467-018-07584-1), 2018-12-11
Supplement: 41467_2018_7584_MOESM1_ESM.pdf [file 41467_2018_7584_MOESM1_ESM.pdf]

**Title**

**Age-specific biological and molecular profiling distinguishes paediatric from adult acute myeloid leukaemias**

**Chaudhury et al**

## Supplementary Figures

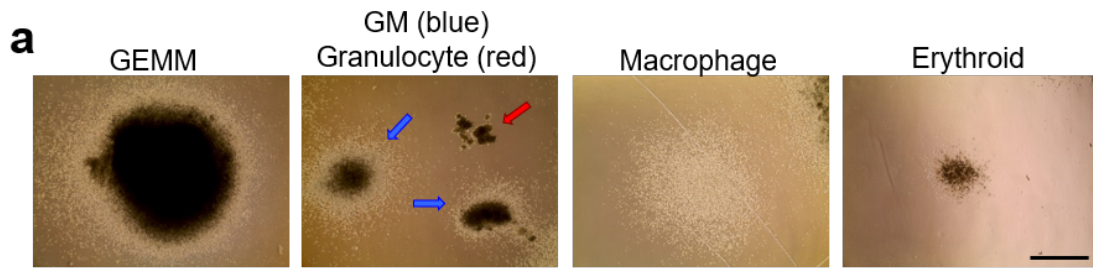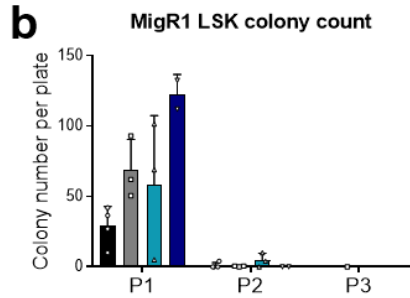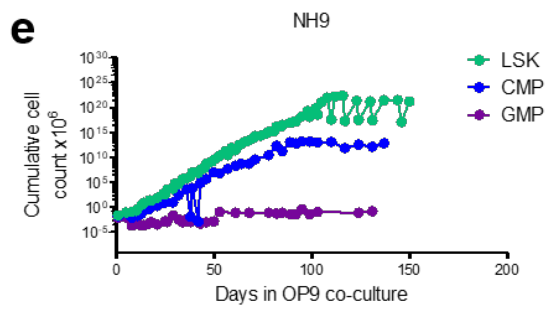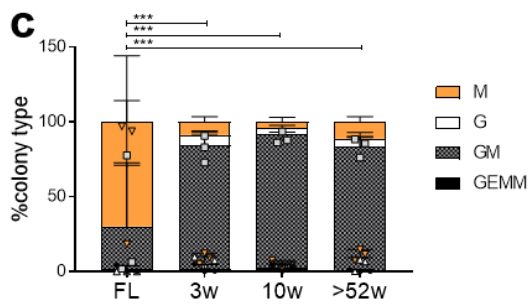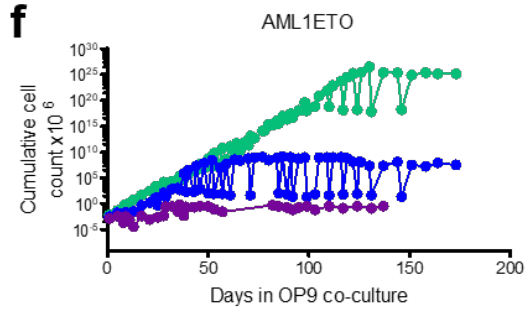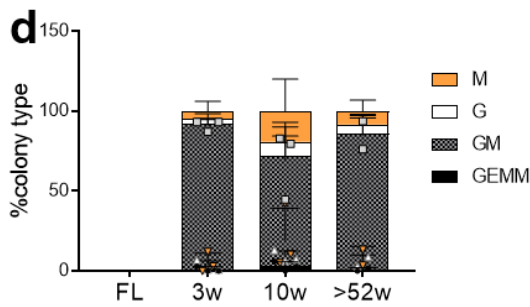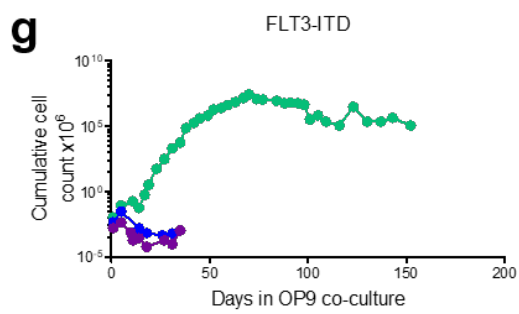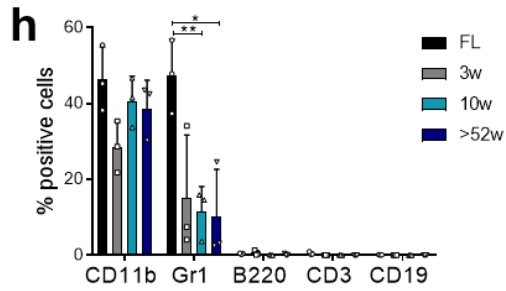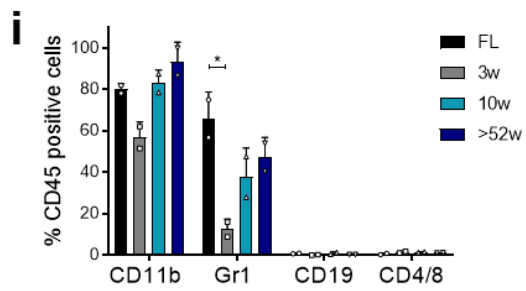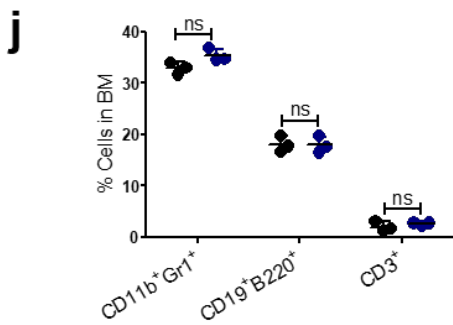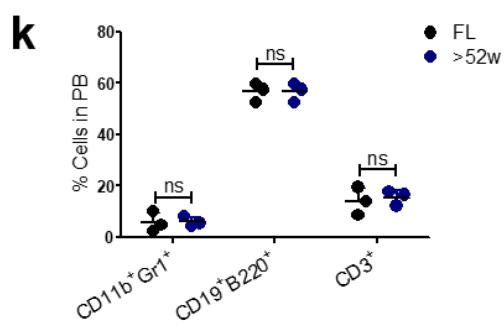

Supplementary Figure 1: Analysis of normal and transformed cells of different ages *in vitro* and *in vivo*. (a) Representative photographs of GEMM, GM, granulocyte, macrophage and erythroid colonies (taken at x4 magnification, black scale bar represents 1mm). (b) Graph of number of colonies produced per plate in CFC assay with LSKs transduced with MigR1 control. Bars depict mean  $\pm$  SD. FL n=4, 3w n=3, 10w n=3, >52w n=3. Graph of percentage colony type produced at P3 from NH9 transduced (c) CMPs and (d) GMPs. Granulocyte erythroid macrophage megakaryocyte (GEMM), granulocyte macrophage (GM), G=granulocyte and M=macrophage. Graphs depict mean percentage  $\pm$ SD. Significance determined by 2-way ANOVA and Bonferroni post-test, \*\*\*p<0.001. FL n=4, 3w n=3, 10w n=3, >52w n=3. Growth of (e) NH9 (n=2), (f) AML1ETO (n=3) and (g) FLT3-ITD (n=2) transduced FL-LSKs, CMPs and GMPs grown on stromal OP9 co-culture. (h) Graph of myeloid and lymphoid surface marker expression in cells at P2 showing no expression of lymphoid markers (FL, 3w, 10w, >52w (n=3)) and (i) after 4 days in co-culture with OP9 cells showing cells from all ages were differentiated into myeloid cells (FL, 3w, 10w, >52w (n=2)). Significance determined by Student's t-test, \*p<0.05, \*\*p<0.01. Graphs shown log<sub>2</sub> mean cumulative cell number normalised to GFP%, n=2. Graph of the distribution of myeloid (CD11b<sup>+</sup>Gr-1<sup>+</sup>), B (B220<sup>+</sup>CD19<sup>+</sup>) and T (CD3<sup>+</sup>) cells in the (j) BM and (k) PB of 6-8wk mice transplanted with healthy LSKs isolated from FL (LSK<sup>FL</sup>) (n=3) or >52w BM (LSK<sup>>52W</sup>) (n=3). Dots represent individual mice with average  $\pm$  SD displayed. ns=not significant as determined by Student's t-test.

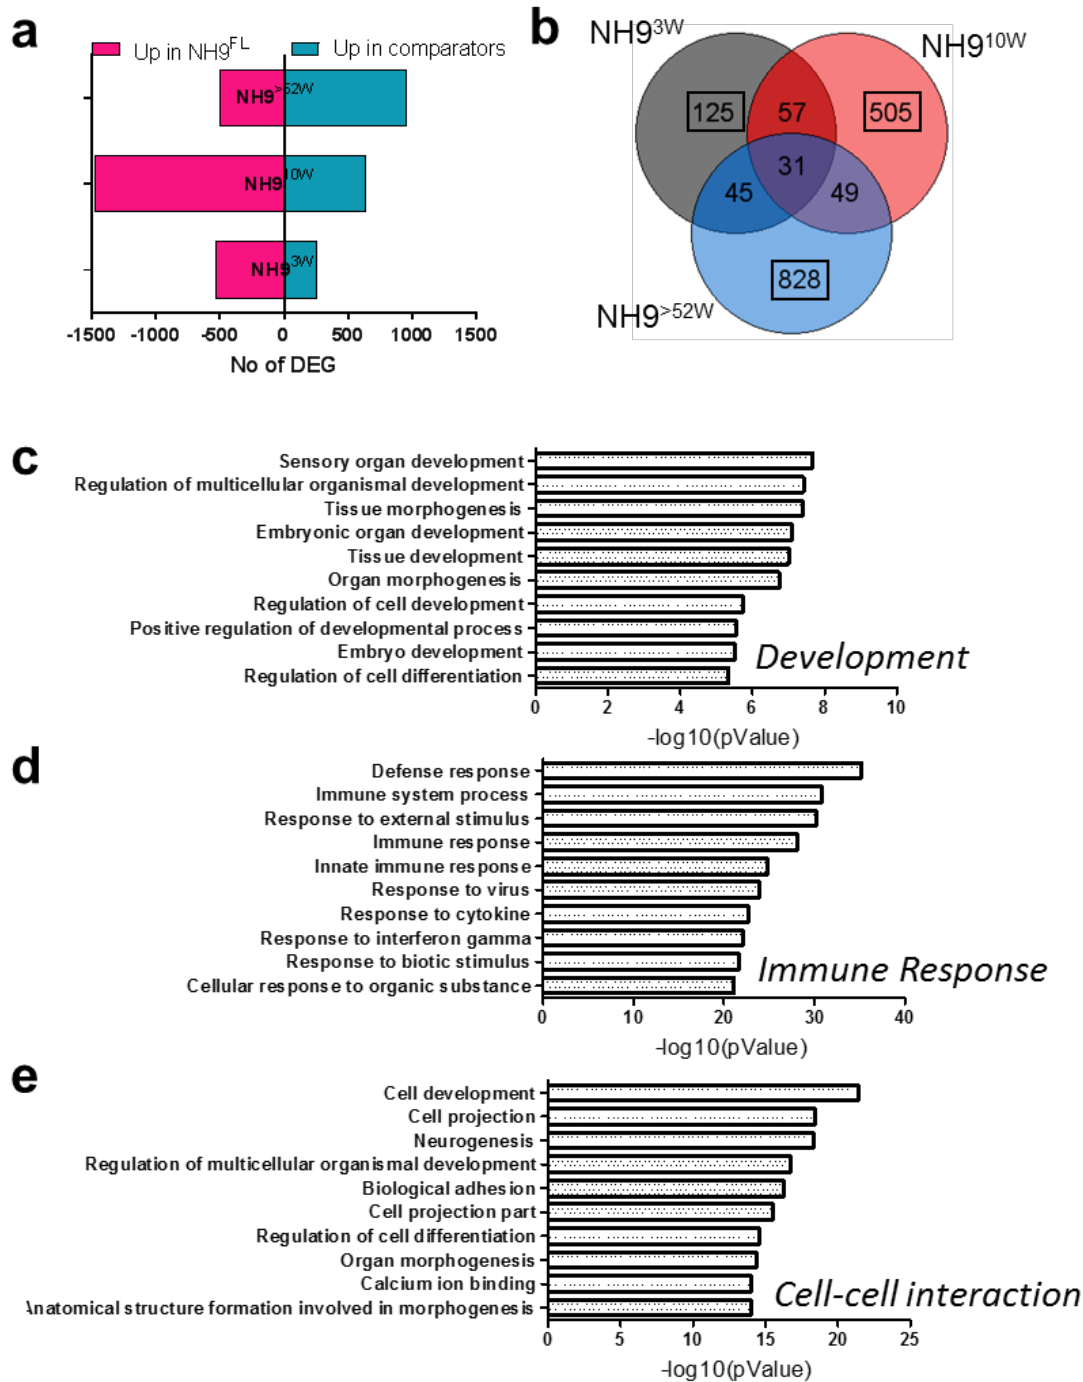

Supplementary Figure 2: Analysis of DEGs in NH9<sup>3w</sup>, NH9<sup>10w</sup> and NH9<sup>52w</sup> compared to NH9<sup>FL</sup>. (a) Summary plot of DEGs in NH9<sup>3w</sup>, NH9<sup>10w</sup> and NH9<sup>52w</sup> compared to NH9<sup>FL</sup>. DEGs are defined as  $q < 0.05$  and  $FC \geq 1.5$ .  $n = 3$  for all groups. (b) Venn diagram of overlapping upregulated DEGs in NH9<sup>3w</sup>, NH9<sup>10w</sup> and NH9<sup>52w</sup> compared to NH9<sup>FL</sup>. Genes highlighted in white boxes were used for pathway analysis (c-e). Top ten significantly enriched GO (Biological Process) pathways using DEGs upregulated solely in (c) NH9<sup>3w</sup>, (d) NH9<sup>10w</sup> and (e) NH9<sup>52w</sup> compared to NH9<sup>FL</sup>.

Analysis was performed on MSigDB using the C5 module, with FDR q-value set to <0.05. Significant pathway enrichment graphed as  $-\log^{10}(\text{p-value})$ .

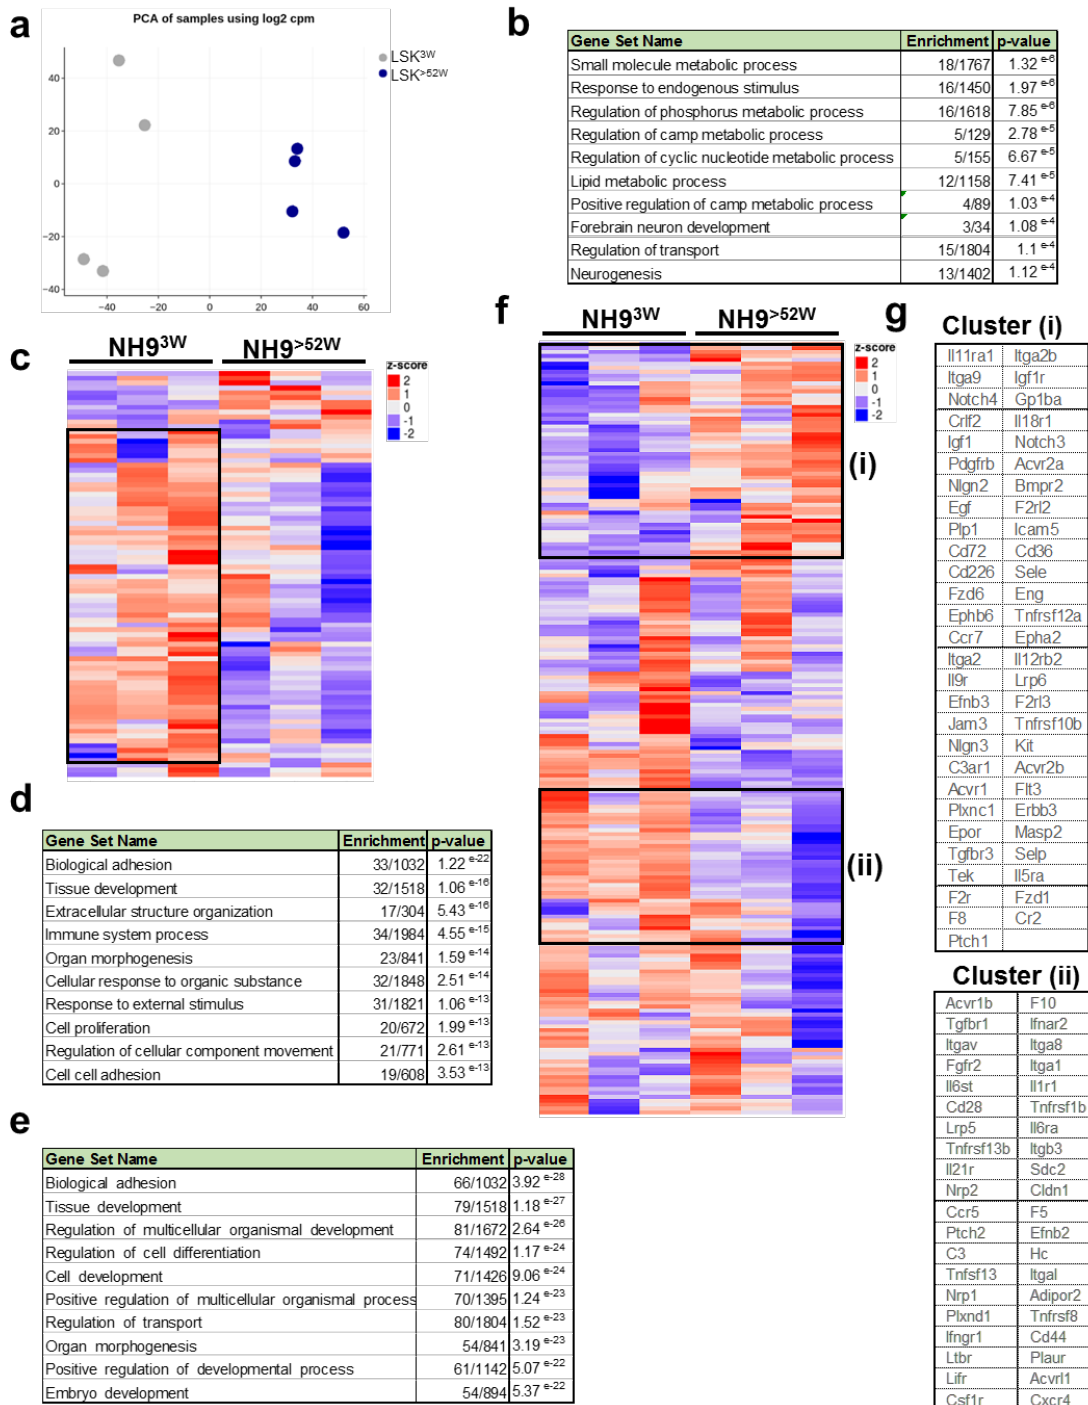

Supplementary Figure 3: Hierarchical clustering analysis of NH9<sup>3W</sup> and NH9<sup>>52W</sup> RNA seq data. (a) Plot of principal component analysis of gene expression in LSK<sup>3W</sup> and LSK<sup>>52W</sup> cells. n=4 in each group. (b) Top ten enriched GO pathways using DEGs upregulated in NH9<sup>>52W</sup> samples compared to NH9<sup>3W</sup> but not in LSK<sup>>52W</sup> samples. Analysis performed on MSigDB using C5 module (GO Biological Processes) with an FDR q-value of <0.05. The RNA seq dataset containing gene expression data from (n=3) NH9<sup>3W</sup> and (n=3) NH9<sup>>52W</sup> myeloid leukaemia blasts was analysed using the

Stemformatics data analysis platform. (c) Hierarchical clustering analysis of the KEGG Toll-like receptor signalling pathway gene set (100 genes) highlighting enrichment in NH9<sup>3w</sup> samples. Top ten enriched GO pathways using DEGs upregulated in (d) LSK<sup>3w</sup> samples compared to LSK<sup>>52w</sup> but not NH9<sup>3w</sup> samples and (e) LSK<sup>>52w</sup> samples compared to LSK<sup>3w</sup> but not NH9<sup>>52w</sup> samples. Analysis performed on MSigDB using C5 module (GO Biological Processes) with an FDR q-value of <0.05. (f) Hierarchical clustering analysis of a gene-signature for receptor-associated genes in cancer-stroma interactions identifying 2 enriched clusters (i,ii). Heat maps (a, f) depict colour-coded (blue-red, low-high) TMM RPKM expression values. (g) Gene cluster (i) upregulated in NH9<sup>>52w</sup> compared to NH9<sup>3w</sup>, as indicated in (f). Gene cluster (ii) upregulated in NH9<sup>3w</sup> compared to NH9<sup>>52w</sup>, as indicated in (f).



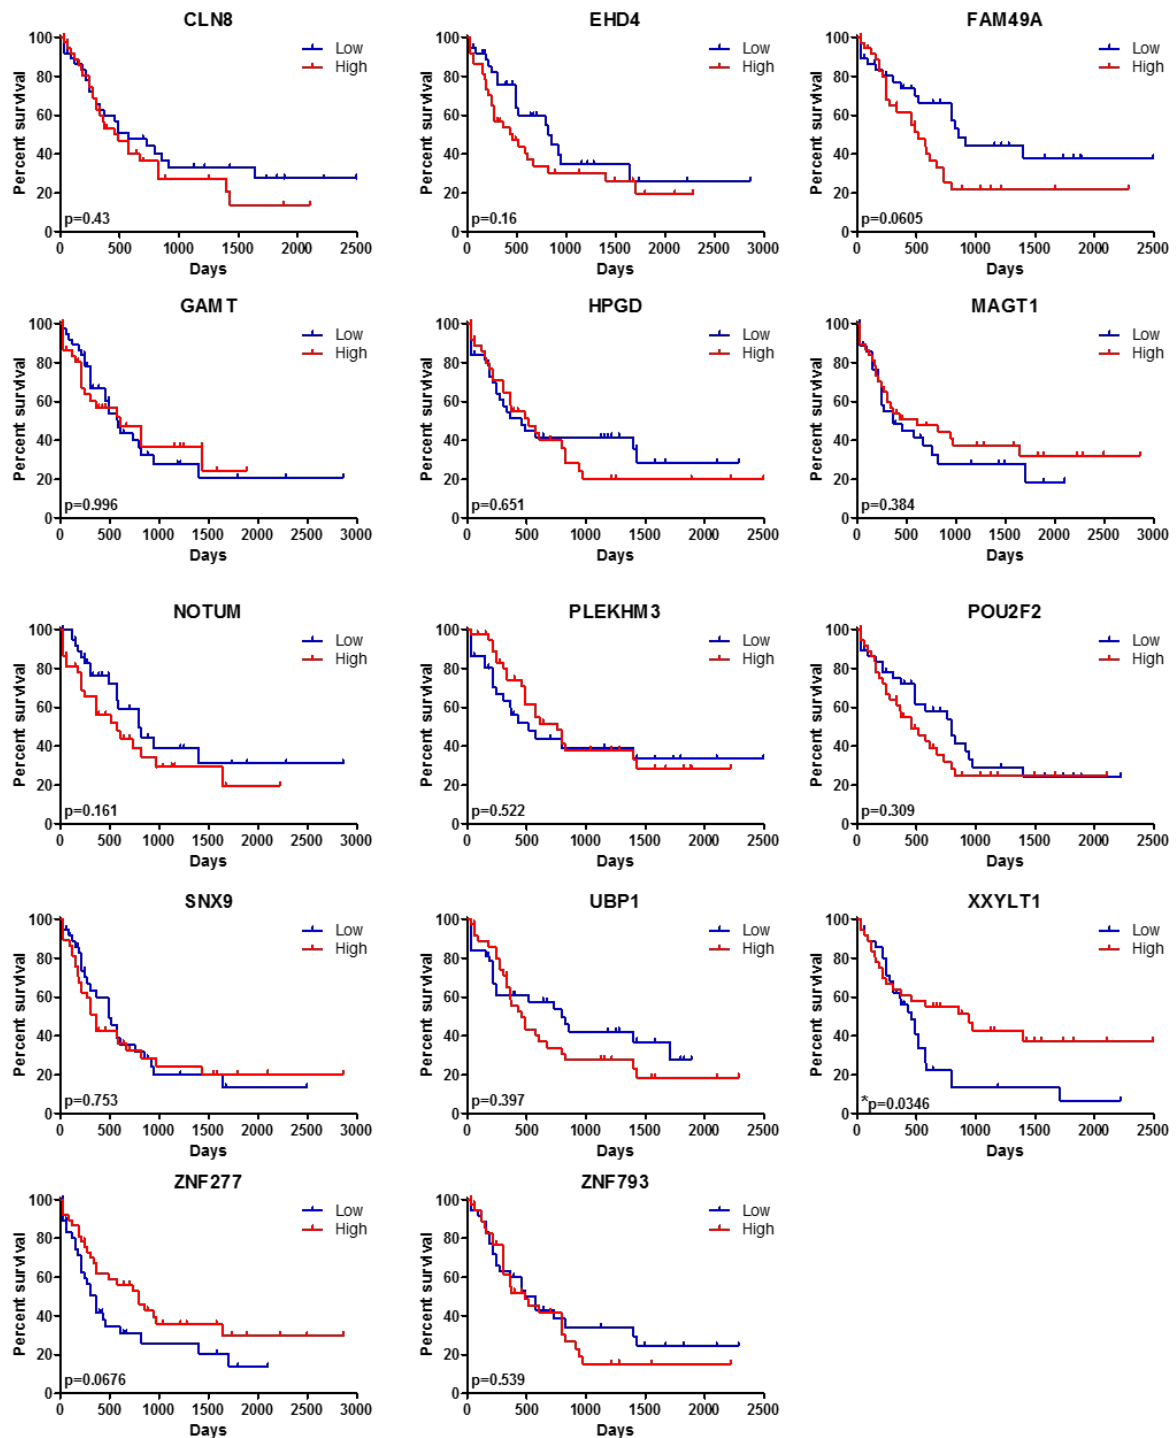

Supplementary Figure 4: Prognostic significance of genes significantly upregulated in human paediatric AML. Kaplan-Meier survival analysis of overall survival of AML patients (n=150) in the TCGA LAML dataset with high (top quartile, n=37) and low (bottom quartile, n=37) expression of genes identified in **Fig 5h**. Significance determined by overall log rank \*p<0.05.

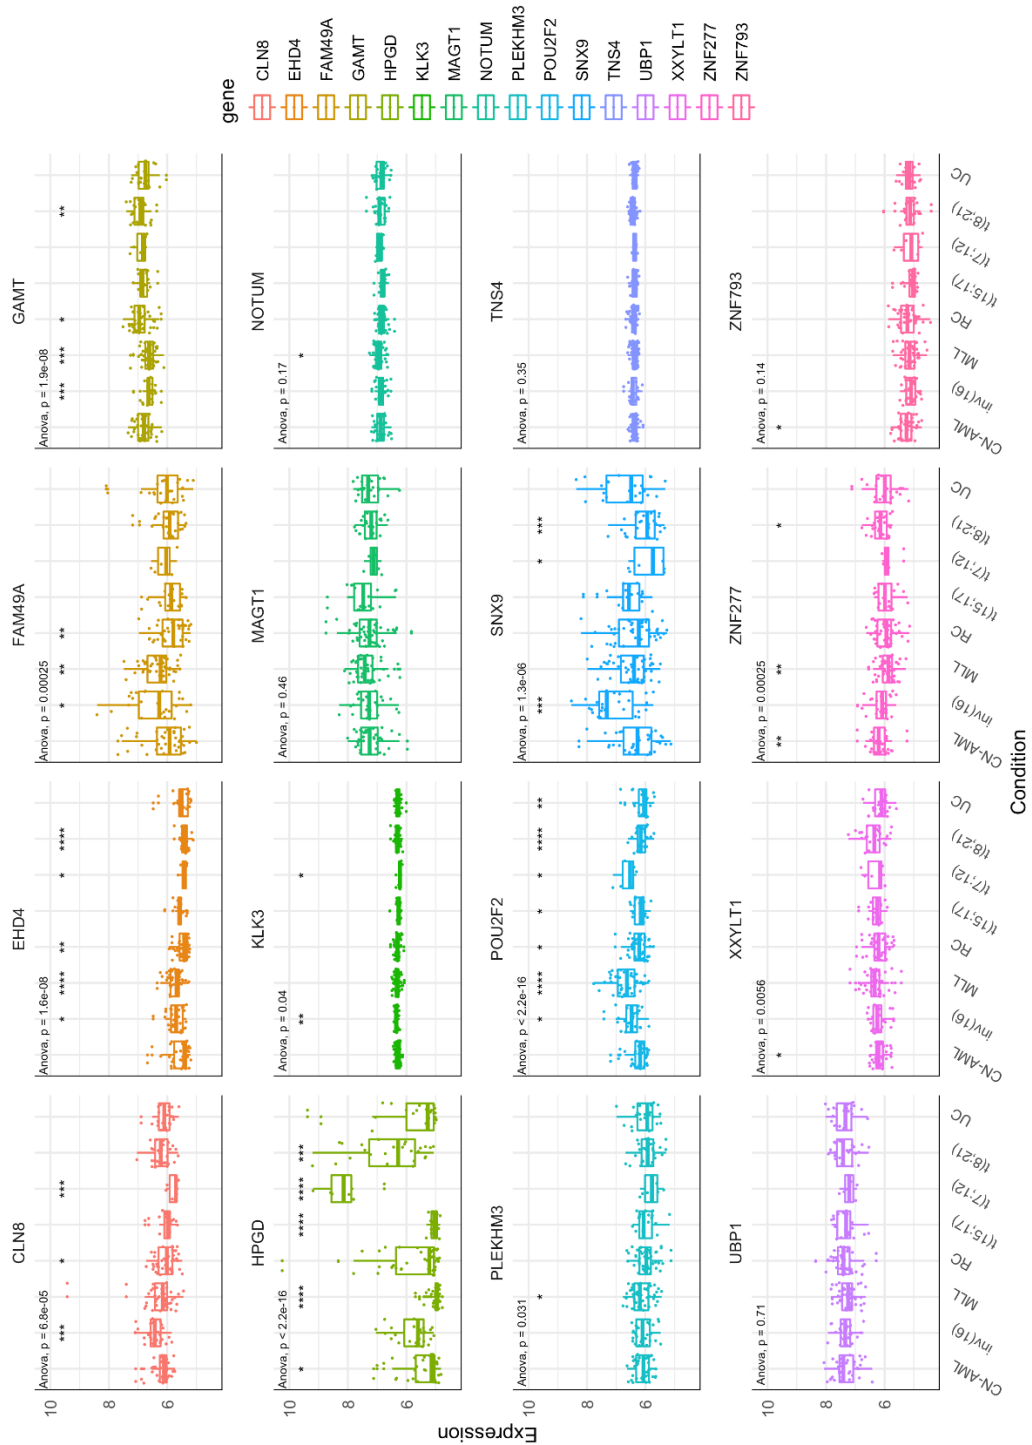

Supplementary Figure 5: Expression of genes significantly upregulated in human paediatric AML categorised by disease subtype. Expression of genes from human paediatric gene signature (**Fig 5h**) in paediatric AML patients (GSE17855) categorised by AML subtypes - cytogenetically normal AML (CN-AML, n=39), AML with inv(16) (n=27), MLL rearranged AML (MLL, n=47), AML with remaining cytogenetics including t(6;9), monosomy 7, trisomy 8 and complex karyotype (RC, n=45), AML with translocations t(15;17) (n=19), t(7;12) (n=7) and t(8;21) (n=28) and

patients with unknown cytogenetics (UC, n=25). Significance determined by ANOVA  
\*p<0.05, \*\*p<0.01, \*\*\*p<0.001, \*\*\*\*p<0.0001.

### DNA Gel – Hprt1

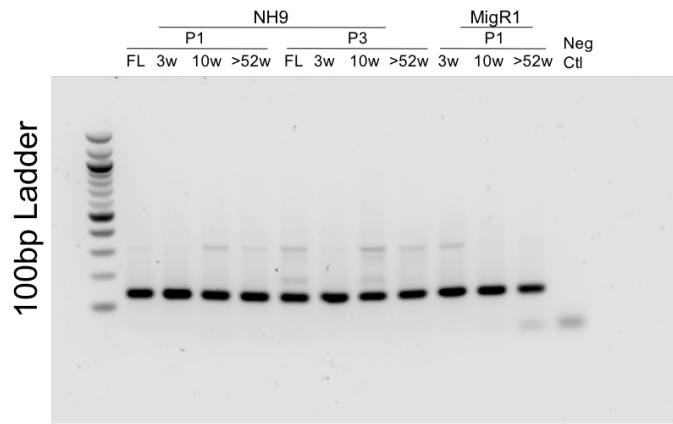

### DNA Gel – NH9

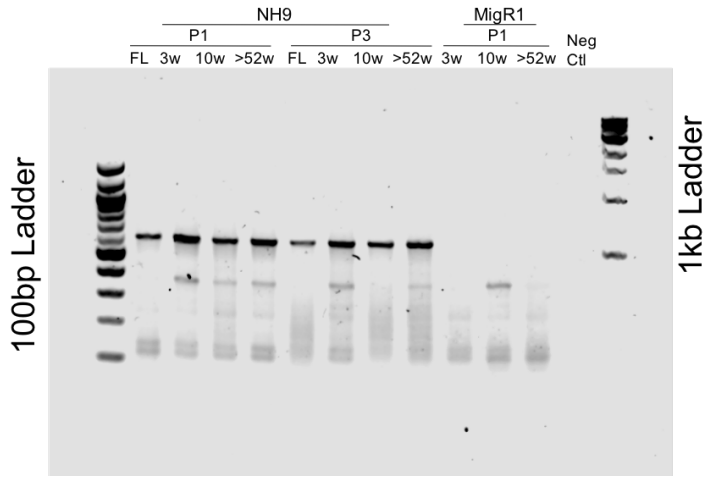

Supplementary Figure 6: Uncropped gels from Figure 1c.

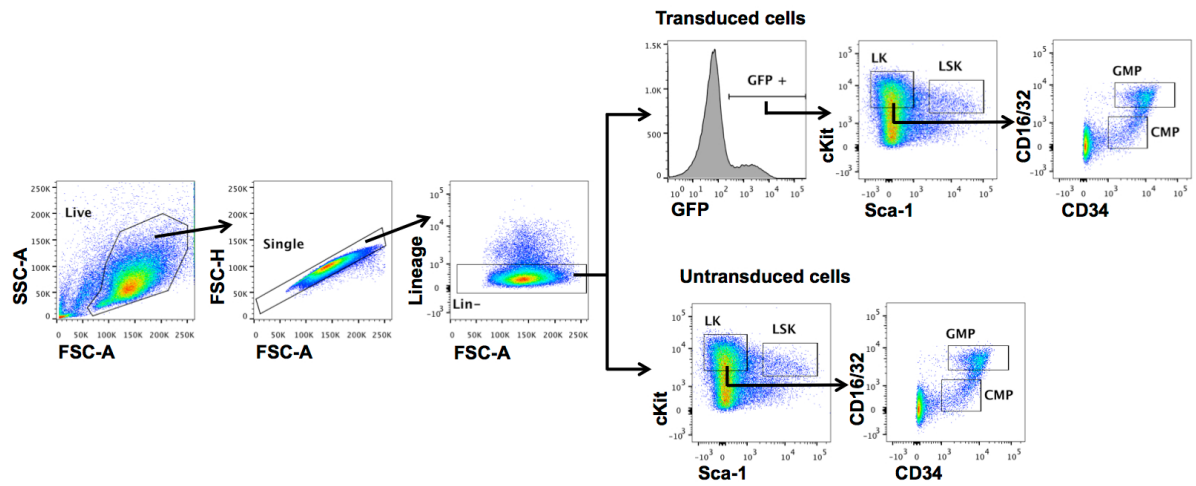

Supplementary Figure 7: Strategy for sorting transduced (top) and untransduced (bottom) LSKs, CMPs and GMPs.

| <b>Primers</b>  | <b>Sequences</b>                                                                            |
|-----------------|---------------------------------------------------------------------------------------------|
| NH9             | Forwards: TAATGAATCCGGGCTCTTTGGTTTTGGCA<br>Reverse: TAA GGT ACC GCA TCA CTC GTC TTT TGC TCG |
| Hprt1           | Forward: GAGAGCGTTGGGCTTACCTC<br>Reverse: ATCGCTAATCACGACGCTGG                              |
| Cebp $\beta$    | Forward: CCGGATCAAACGTGGCTGAG<br>Reverse: CACGTGTGTTGCGTCAGTC                               |
| Cebp $\epsilon$ | Forward: GAGGCAGCTACAATCCCCTG<br>Reverse: CACAGGGGCCTTGAGGACA                               |
| Fcgr3           | Forward: TCTGCTGCTGTTTGCTTTTGC<br>Reverse: CCAGTTTCACCACAGCCTTC                             |
| Cd79a           | Forward: GTCATACGCCTGTTTGGGTCC<br>Reverse: AAGGCTGAACCACCATGTGA                             |
| Ptprc           | Forward: GTCACAGGGCAAACACCTACA<br>Reverse: AGGGCATTCTCTGTTGTGCTC                            |
| Pou2af1         | Forward: CCTCGGTGTTGACCTATGCT<br>Reverse: CAGTGCTTCTTGGCGTGACA                              |
| Foxo1           | Forward: GAGTTAGTGAGCAGGCTACATTT<br>Reverse: TTGGACTGCTCCTCAGTTCC                           |
| Vpreb1          | Forward: CTGGACGTCTGCTCCTGCTCA<br>Reverse: AGGGCCACAACCTGTGAGATAG                           |
| Rag1            | Forward: GTTGCTATCTCTGTGGCATCG<br>Reverse: TAAGCTACCTTGCTCCACAGG                            |
| Rag2            | Forward: AGTGA CTCTCCCAAGTGC<br>Reverse: TTCTTATTTGGCACTGAAGGC                              |
| Il7 $\alpha$    | Forward: GGCCTAGTCTCCCCGATCA<br>Reverse: TTCAGACTCGTTTTTGGCTTCT                             |
| Flt3            | Forward: TTGGCCTTTGTGTCTTCCGT<br>Reverse: TTGCGAGCTGGTAGCGTTTA                              |

Supplementary Table 1: List of primers including names and sequences
